# Supplementary material
Source: MDPI journal article supplement (https://www.mdpi.com/1424-2818/14/10/890)
Supplement: s1 [file s1]

Archive with 3 entries (3 files):
- Dermaptera_Figures S1-3.pdf
- Dermaptera_Table S1.xlsx
- Dermaptera_Table S2.pdf
