# Supplementary material
Source: MDPI journal article supplement (https://www.mdpi.com/1424-2818/14/10/890)
Supplement: s1 [file s1 › Dermaptera_Table S1.xlsx]

## Sheet: Table S1
Table S1. Longitude, latitude, area, average temperature, average precipitation and number of earwig species for countries classified as mainlands or islands.
Country	Mainland(M)/island(I)	Latitude (decimal degrees) [1]	Longitude (decimal degrees) [1]	Area (square km2) [2]	Number of pecies [3]	Average annual temperature (°C) [4]	Average annual precipitation (mm) [5]
Afghanistan	M	33.8352	66.0047	652864	13	12.6	327
Algeria	M	28.1589	2.61732	2381741	16	22.5	89
American Samoa	I	-14.3045	-170.718	200	7	26.7	5100
Andorra	M	42.5423	1.56053	468	5	7.6	812.3
Angola	M	-12.2934	17.5374	1246700	42	21.55	1010
Antigua and Barbuda	I	17.2775	-61.7947	442	11	25.85	1030
Argentina	M	-35.3814	-65.1798	2780400	37	14.8	591
Australia	I/M	-25.7329	134.491	7688126	88	21.65	534
Bahamas, The	I	24.2903	-76.6284	13939	7	24.85	1292
Bangladesh	M	23.8673	90.2381	147570	1	25	2666
Barbados	I	13.1815	-59.5598	430	11	26	1422
Belarus	M	53.5313	28.0321	207595	2	6.15	618
Belize	M	17.2003	-88.7101	22965	2	25.35	1705
Benin	M	9.64175	2.32785	114763	6	27.55	1039
Bhutan	M	27.4111	90.4019	38394	47	7.4	2200
Bolivia	M	-16.7081	-64.6854	1098581	27	21.55	1146
Bosnia and Herzegovina	M	44.1745	17.7688	51209	9	9.85	1028
Botswana	M	-22.184	23.7985	581730	2	21.5	416
Brazil	M	-10.7878	-53.0978	8515767	147	24.95	1761
Brunei	I	4.51968	114.722	5765	42	26.85	2722
Bulgaria	M	42.7689	25.2155	111002	7	10.55	608
Burkina Faso	M	12.2695	-1.75457	270764	1	28.29	748
Saudi Arabia	M	-3.35939	29.8751	27834	8	19.8	1274
Cambodia	M	12.72	104.907	181035	1	26.8	1904
Cameroon	M	5.6911	12.7396	476350	86	24.6	1604
Canada	M	61.3621	-98.3078	9984670	7	-5.1	537
Central African Republic	M	6.56823	20.4683	622436	14	24.9	1343
Chad	M	15.3333	18.6449	1284000	8	26.55	322
Chile	M	-37.7307	-71.3826	756096	20	8.45	1522
China	M	36.5618	103.819	9572900	229	7.5	645
Colombia	M	3.91383	-73.0811	1141748	43	24.5	3240
Congo, Democratic Republic of the	M	-2.87746	23.644	2345410	128	24	1543
Congo, Republic of the	M	-0.837882	15.2197	342000	40	24.55	1646
Costa Rica	M	9.97634	-84.1921	51100	73	24.8	2926
Côte d’Ivoire	M	7.62843	-5.69216	322463	44	26.35	1348
Cuba	I	21.6229	-79.0161	109884	22	25.2	1335
Cyprus	I	34.9167	33.006	9251	7	18.45	498
Czech Republic	M	49.7334	15.3124	78865	7	7.55	677
Denmark	M	55.9813	10.028	42916	4	6.95	703
Dominican Republic	I	18.8943	-70.5057	48311	11	24.55	1410
Ecuador	M	-1.42382	-78.752	256370	48	21.85	2274
Egypt	M	26.4959	29.8619	1010408	8	22.1	18
El Salvador	I	13.7394	-88.8716	21040	6	24.45	1784
Equatorial Guinea	M	1.70554	10.3414	28051	20	24.55	2156
Eritrea	M	15.3619	38.8462	121100	10	25.5	384
Estonia	M	58.6719	25.5425	45227	3	2	626
Eswatini (Swaziland)	M	-26.5584	31.4819	17364	1	21.4	788
Ethiopia	M	8.62278	39.6008	1063652	27	22.2	848
Finland	M	64.4988	26.2747	390903	3	1.55	536
France	M	46.187	2.53618	543965	17	10.7	867
Georgia	M	42.1686	43.5078	69700	2	5.65	1026
Germany	M	51.107	10.3858	357104	8	8.4	700
Ghana	M	7.95345	-1.21677	238533	35	27.2	1187
Greece	M	39.0747	22.9556	131957	16	15.4	652
Greenland	I	74.7105	-41.3419	2166086	1	-18.71	39.07
Guam	I	13.4417	144.768	561	7	27.6	2492
Guinea	M	10.4362	-10.9407	245857	58	25.7	1651
Guyana	M	4.79378	-58.982	214999	16	26	2387
Honduras	M	14.8269	-86.6152	112492	6	23.5	1976
Hungary	M	47.1628	19.3956	93024	7	9.75	589
Iceland	I	64.9958	-18.574	103022	0	0.7	1940
India	M	22.8858	79.612	3166391	239	23.65	1083
Indonesia	I	-2.21505	117.24	1910931	204	25.85	2702
Iran	M	32.575	54.2741	1628771	13	17.25	228
Iraq	M	33.0397	43.7435	434128	2	21.4	216
Ireland	I	53.1754	-8.13793	70273	3	9.3	1118
Italy	M	42.7966	12.07	302073	24	13.45	832
Jamaica	I	18.157	-77.3148	10991	12	24.95	2051
Japan	I	37.5923	138.031	377873	35	11.15	1668
Jordan	M	31.2458	36.7714	88794	3	18.3	111
Kazakhstan	M	48.1569	67.2915	2724900	5	5.5	250
Kenya	M	0.599875	37.7959	591971	54	24.75	630
Korea, North	M	40.1535	127.192	122762	22	5.7	1054
Korea, South	M	36.3852	127.839	97100	22	11.5	1274
Kuwait	M	29.3343	47.587	17818	1	27.15	121
Kyrgyzstan	M	41.4622	74.5417	199945	1	2.1	533
Laos	M	18.5022	103.738	236800	5	22.8	1834
Libya	M	27.0309	18.0087	1676198	6	21.8	56
Lithuania	M	55.3261	23.8872	65286	4	6.2	656
Luxembourg	M	49.7672	6.07183	2586	2	8.65	934
Madagascar	I	-19.3719	46.7047	587295	82	22.65	1513
Malawi	M	-13.2181	34.2894	118484	29	21.9	1181
Mali	M	17.3458	-3.54269	1241238	6	28.25	282
Malta	I	35.9215	14.4052	315.2	5	19.2	560
Mauritania	M	20.2574	-10.3478	1030700	4	27.65	92
Mexico	M	23.9475	-102.523	1964375	67	21	758
Mongolia	M	46.8268	103.053	1564116	5	1.7	241
Morocco	M	29.8376	-8.45616	439850	13	17.1	346
Mozambique	M	-17.2738	35.5337	799380	23	23.8	1032
Myanmar (Burma)	M	21.1857	96.4884	676533	84	13.05	2091
Namibia	M	-22.1303	17.2096	824292	7	19.95	285
Nepal	M	28.2489	83.9158	147181	58	8.1	1500
Netherlands	M	52.1008	5.28147	34040	7	9.25	778
Niger	M	17.4191	9.38546	1267000	3	27.15	151
Nigeria	M	9.59412	8.08944	923769	41	27	1150
Norway	M	68.7501	15.3483	385208	4	1.5	1414
Oman	M	20.6052	56.0917	309980	3	25.6	125
Pakistan	M	29.9498	69.3396	881889	5	20.2	494
Panama	M	8.51751	-80.1192	75320	61	25.4	2928
Papua New Guinea	I	-6.46416	145.207	462840	90	25.25	3142
Paraguay	M	-23.2282	-58.4001	406752	27	23.55	1130
Peru	M	-9.1528	-74.3824	1285216	55	19.6	1738
Philippines	I	11.7754	122.884	300000	110	25.55	2348
Poland	M	52.1276	19.3901	312679	7	7.85	600
Portugal	M	39.5955	-8.50106	92226	13	15.15	854
Puerto Rico	I	18.2281	-66.4731	8868	6	28	2054
Qatar	M	25.306	51.1848	11627	2	27.15	74
Romania	M	45.8524	24.9729	238397	9	8.8	637
Russia	M	61.9805	96.6866	17125000	34	-5.35	460
Saudi Arabia	M	24.1225	44.5369	2149690	6	24.65	59
Senegal	M	14.3662	-14.4735	196712	10	27.85	686
Seychelles	I	-4.66098	55.476	452	23	27.15	2330
Singapore	I	1.35877	103.817	722.5	3	26.45	2497
Slovenia	M	46.1156	14.8044	20273	7	8.9	1162
Solomon Islands	I	-8.92176	159.633	30407	30	25.65	3028
Somalia	M	4.75065	45.7072	637657	4	27.05	282
South Africa	M	-29.0003	25.0839	1220813	48	17.75	495
South Sudan	M	7.30878	30.2479	644329	14	27.5	900
Spain	M	40.2445	3.64755	505944	30	13.3	636
Sri Lanka	I	7.61266	80.7011	65610	58	26.95	1712
Sudan	M	15.9904	29.9405	1844797	14	26.9	250
Sweden	M	62.7923	16.7437	447420	8	1.75	624
Switzerland	M	46.7979	8.20866	41285	9	5.1	1537
Syria	M	35.0255	38.5079	185180	13	17.75	252
Taiwan	I	23.754	120.954	36197	56	18.5	2600
Tanzania	M	-6.27566	34.8131	947303	107	22.35	1071
Thailand	M	15.1182	101.003	513120	44	26.3	1622
Trinidad and Tobago	I	10.4574	-61.2657	5127	9	25.75	2200
Tunisia	M	34.1196	9.55288	163610	11	19.2	207
Turkey	M	39.0616	35.169	785347	20	9.9	593
Turkmenistan	M	39.1155	59.371	491210	2	15.1	161
Uganda	M	1.27469	32.3691	241551	55	22.8	1180
Ukraine	M	48.9966	31.3833	603549	14	8.3	565
United Kingdom	I	54.1239	-2.86563	242500	7	8.45	1220
United States	M	45.6796	-112.462	9525067	28	8.55	715
Uruguay	M	-32.7995	-56.0181	175016	3	17.55	1300
Uzbekistan	M	41.7555	63.14	447400	4	12.05	206
Venezuela	M	7.12422	-66.1818	916445	85	25.35	2044
Vietnam	M	16.646	106.299	331231	5	24.45	1821
Zambia	M	-13.4582	27.7748	752614	17	21.4	1020
Zimbabwe	M	-19.0042	29.8515	390757	25	21	657
Source of data
[1] https://cran.r-project.org/web/packages/rworldmap/vignettes/rworldmap.pdf
[2] https://www.britannica.com/topic/list-of-the-total-areas-of-the-worlds-countries-dependencies-and-territories-2130540
[3] http://www.earwigs- online.de.
[4] https://en.wikipedia.org/wiki/List_of_countries_by_average_yearly_temperature; https://en.wikipedia.org/wiki/American_Samoa; https://en.wikipedia.org/wiki/Guam#Climate; https://climateknowledgeportal.worldbank.org/country/greenland/climate-data-historical; https://en.wikipedia.org/wiki/Puerto_Rico#Climate; https://en.wikipedia.org/wiki/South_Sudan#Climate; https://de.wikipedia.org/wiki/Taiwan…
[5] https://en.wikipedia.org/wiki/List_of_countries_by_average_annual_precipitation; https://en.wikipedia.org/wiki/American_Samoa; https://en.wikipedia.org/wiki/Andorra#Climate; https://climateknowledgeportal.worldbank.org/country/greenland/climate-data-historical; https://en.wikipedia.org/wiki/Taiwan#Climate
